# Supplementary material for: Digital Information Approach through Social Media among Gen Z and Millennials: The Global Scenario during the COVID-19 Pandemic
Source: MDPI journal article supplement (doi:10.3390/vaccines10111822), 2022-10-28
Supplement: s1 [file s1]

**Table S1.** Percentages of young respondents about selected behaviors, by geographical area (according to the World Bank classification by income level).

|                                                                                                                                                   | HIC<br>N = 9475 | UMIC<br>N = 8000 | LMIC<br>N = 6007 | HIC vs<br>UMIC<br><i>p</i> -value* | HIC vs<br>LMIC<br><i>p</i> -value* | UMIC vs<br>LMIC<br><i>p</i> -value* |
|---------------------------------------------------------------------------------------------------------------------------------------------------|-----------------|------------------|------------------|------------------------------------|------------------------------------|-------------------------------------|
|                                                                                                                                                   | %               | %                | %                |                                    |                                    |                                     |
| <b>How many social media friends or followers</b>                                                                                                 |                 |                  |                  | <0.01                              | <0.01                              | <0.01                               |
| Under 50                                                                                                                                          | 14.9            | 11.4             | 11.4             |                                    |                                    |                                     |
| 50 to 99                                                                                                                                          | 12.0            | 10.1             | 9.5              |                                    |                                    |                                     |
| 100 to 249                                                                                                                                        | 21.1            | 17.1             | 16.4             |                                    |                                    |                                     |
| 250 to 499                                                                                                                                        | 19.5            | 19.1             | 15.8             |                                    |                                    |                                     |
| 500 to 999                                                                                                                                        | 16.1            | 18.9             | 19.0             |                                    |                                    |                                     |
| 1000 to 5000                                                                                                                                      | 12.9            | 19.0             | 22.3             |                                    |                                    |                                     |
| Over 5000                                                                                                                                         | 3.5             | 4.4              | 5.6              |                                    |                                    |                                     |
| <b>We all share a lot of information on social media/messaging apps these days - do you make sure that information is correct before sharing?</b> |                 |                  |                  | <0.01                              | <0.01                              | <0.01                               |
| I don't share content                                                                                                                             | 8.4             | 4.5              | 4.7              |                                    |                                    |                                     |
| Sometimes                                                                                                                                         | 18.1            | 14.4             | 16.7             |                                    |                                    |                                     |
| Most of the time                                                                                                                                  | 39.7            | 35.3             | 33.6             |                                    |                                    |                                     |
| All of the time                                                                                                                                   | 33.8            | 45.8             | 45.0             |                                    |                                    |                                     |
| <b>Have you ever shared something on social media/messaging apps that you later found out was incorrect?</b>                                      |                 |                  |                  | <0.01                              | <0.01                              | <0.01                               |
| I don't share content on social media/messaging apps                                                                                              | 8.4             | 5.2              | 5.8              |                                    |                                    |                                     |
| I don't know                                                                                                                                      | 17.9            | 11.1             | 9.5              |                                    |                                    |                                     |
| No                                                                                                                                                | 38.1            | 46.1             | 44.3             |                                    |                                    |                                     |
| Yes                                                                                                                                               | 35.5            | 37.6             | 40.4             |                                    |                                    |                                     |
| <b>Did you later share a correction or delete?</b>                                                                                                |                 |                  |                  | 0.16                               | 0.01                               | 0.21                                |
| No                                                                                                                                                | 4.5             | 4.9              | 4.8              |                                    |                                    |                                     |
| Yes                                                                                                                                               | 27.4            | 32.8             | 35.7             |                                    |                                    |                                     |
| Missing                                                                                                                                           | 68.1            | 62.3             | 59.5             |                                    |                                    |                                     |
| <b>How do you react to COVID?</b>                                                                                                                 |                 |                  |                  | <0.01                              | <0.01                              | <0.01                               |
| I ignore the content                                                                                                                              | 36.4            | 36.7             | 30.7             |                                    |                                    |                                     |
| I report the content                                                                                                                              | 22.7            | 28.1             | 22.0             |                                    |                                    |                                     |
| I comment on the content                                                                                                                          | 16.8            | 17.5             | 25.7             |                                    |                                    |                                     |
| I unfollow the person who posted it                                                                                                               | 8.8             | 8.2              | 9.1              |                                    |                                    |                                     |
| I share the content                                                                                                                               | 6.9             | 5.6              | 9.2              |                                    |                                    |                                     |
| I don't know                                                                                                                                      | 8.3             | 3.8              | 3.2              |                                    |                                    |                                     |
| <b>How have you engaged with the World Health Organization (WHO) so far during the COVID-19 crisis?</b>                                           |                 |                  |                  |                                    |                                    |                                     |
| I actively search for WHO health directives                                                                                                       | 26.7            | 35.8             | 42.7             | <0.01                              | <0.01                              | <0.01                               |
| I visit the WHO website                                                                                                                           | 34.5            | 42.8             | 51.6             | <0.01                              | <0.01                              | <0.01                               |

|                                                                                                      |      |      |      |       |       |       |
|------------------------------------------------------------------------------------------------------|------|------|------|-------|-------|-------|
| I follow the WHO on social media                                                                     | 27.6 | 38.3 | 53.1 | <0.01 | <0.01 | <0.01 |
| I do not engage with WHO                                                                             | 35.8 | 22.7 | 14.0 | <0.01 | <0.01 | <0.01 |
| <b>Why have you not engaged with the World Health Organization (WHO) during the COVID-19 crisis?</b> |      |      |      |       |       |       |
| I don't know what WHO is                                                                             | 3.4  | 1.6  | 0.8  | <0.01 | <0.01 | <0.01 |
| I do not engage with WHO content because I do not trust it                                           | 6.7  | 6.9  | 2.8  | 0.57  | <0.01 | <0.01 |
| I do not engage with WHO content because I have been using other sources                             | 13.8 | 8.5  | 5.0  | <0.01 | <0.01 | <0.01 |
| I don't know how to find WHO information                                                             | 7.8  | 3.9  | 3.2  | <0.01 | <0.01 | 0.02  |

HIC: High income countries; LMIC: Low-middle income countries; UMIC: Upper-middle income countries. \**p*-value for the comparison test (i.e., Chi-square test or *t*-test for the number of platforms usually used). Since Bonferroni's correction for multiple comparisons is adopted, a *p*-value < 0.02 (0.05/3) indicates significant differences among pairs.
