# Supplementary material for: Digital Information Approach through Social Media among Gen Z and Millennials: The Global Scenario during the COVID-19 Pandemic
Source: MDPI journal article supplement (doi:10.3390/vaccines10111822), 2022-10-28
Supplement: s1 [file s1]

## **Supplemental material – Questionnaire**

**Q1 In today's global COVID19 crisis, some people are concerned that they are at risk of infection while others are not -- how concerned are you? (SingleSelection) (Screening question)**

- Very concerned
- Somewhat concerned
- Not concerned at all
- I don't care about COVID-19
- I don't know what is COVID-19

**Q2 When considering the broader impacts of the COVID-19 crisis - what are you specifically worried about? Please select all that apply. (MultipleSelection)**

- Friends and family members getting infected
- Access to education
- Employment uncertainty
- Facing financial constraints
- Economy crashing
- Increasing political tensions
- Significant change of my lifestyle
- Losing touch with my social community
- Not being able to access healthcare
- Uncertainties regarding residency status
- Not being able to travel/ visit friends and family
- Discrimination
- Running out of food
- My mental health
- I am not worried about the broader impacts of the COVID-19 crisis
- Other

**Q3 Which social media platforms or messaging apps do you usually use? Please select all that apply. (MultipleSelection)**

- Facebook
- Twitter
- Instagram
- TikTok
- WeChat
- LinkedIn
- Tumblr
- WhatsApp
- Snapchat
- Pinterest
- Reddit
- YouTube
- Vimeo
- Discord
- Telegram

- Facebook Messenger
- Skype
- Zoom
- House Party
- Viber
- QZone
- Tencent QQ
- iMessage
- YY
- VK
- Skyrock
- Quora
- Weibo
- Other

**Q4 How many friends or followers do you have across your social media? (SingleSelection)**

- Under 50
- 50 to 99
- 100 to 249
- 250 to 499
- 500 to 999
- 1,000 to 5,000
- Over 5,000

**Q5 For COVID-19 news, information and updates, to which of the following sources do you go to first? (MultipleSelection)**

- National newspapers, television and radio (including websites and streaming)
- International newspapers, television and radio (including websites and streaming)
- Social media content by traditional media (e.g. newspapers, television, radio)
- Social media content by my government
- Social media content by the World Health Organization (WHO)
- Social media content by science and health experts
- Social media content by celebrities and influencers
- Social media content by alternative movement leaders
- Social media content by sources I cannot identify
- Social media content by family
- Social media content by friends
- Actively searching using search sites (such as Google, Baidu)
- Friends (as part of a personal conversation)
- Family (as part of a personal conversation)
- Educators (as part of a personal or academic conversation)
- Religious leaders (as part of a personal or religious conversation)
- Co-workers (as part of a personal or workplace conversation)
- Other

**Q6 And which of the following sources do you then use to learn more about this information? Please select all that apply. (MultipleSelection)**

- National newspapers, television and radio (including websites and streaming)
- International newspapers, television and radio (including websites and streaming)
- Social media content by traditional media (e.g. newspapers, television, radio)
- Social media content by my government
- Social media content by the World Health Organization (WHO)
- Social media content by science and health experts
- Social media content by celebrities and influencers
- Social media content by alternative movement leaders
- Social media content by sources I cannot identify
- Social media content by family
- Social media content by friends
- Actively searching using search sites (such as Google, Baidu)
- Friends (as part of a personal conversation)
- Family (as part of a personal conversation)
- Educators (as part of a personal or academic conversation)
- Religious leaders (as part of a personal or religious conversation)
- Co-workers (as part of a personal or workplace conversation)
- Other

**Q7 When a vaccine becomes available, which of the following sources would you look to first for information? (MultipleSelection)**

- National newspapers, television and radio (including websites and streaming)
- International newspapers, television and radio (including websites and streaming)
- Social media content by traditional media (e.g. newspapers, television, radio)
- Social media content by my government
- Social media content by the World Health Organization (WHO)
- Social media content by science and health experts
- Social media content by celebrities and influencers
- Social media content by alternative movement leaders
- Social media content by sources I cannot identify
- Social media content by family
- Social media content by friends
- Actively searching using search sites (such as Google, Baidu)
- Friends (as part of a personal conversation)
- Family (as part of a personal conversation)
- Educators (as part of a personal or academic conversation)
- Religious leaders (as part of a personal or religious conversation)
- Co-workers (as part of a personal or workplace conversation)
- Other

**Q8 When it comes to trust in sources, people have different opinions. Please rank the sources based on your level of trust from the list below: (MatrixSingleSelection)**

|                                                                                                            | Highly trust | Trust | Somewhat trust | Don't trust | Don't know |
|------------------------------------------------------------------------------------------------------------|--------------|-------|----------------|-------------|------------|
| Newspapers (including websites, streaming and information these organizations have shared on social media) |              |       |                |             |            |
| Television (including websites, streaming and information these organizations have shared on social media) |              |       |                |             |            |
| World Health Organization (WHO)                                                                            |              |       |                |             |            |
| Science and health experts                                                                                 |              |       |                |             |            |
| Family                                                                                                     |              |       |                |             |            |
| Friends                                                                                                    |              |       |                |             |            |
| Educators                                                                                                  |              |       |                |             |            |
| Radio (including websites, streaming and information these organizations have shared on social media)      |              |       |                |             |            |

**Q9 When it comes to trust in sources, people have different opinions. Please rank the sources based on your level of trust from the list below: (MatrixSingleSelection)**

|                                                  | Highly trust | Trust | Somewhat trust | Don't trust | Don't know |
|--------------------------------------------------|--------------|-------|----------------|-------------|------------|
| Alternative movement leaders                     |              |       |                |             |            |
| My government                                    |              |       |                |             |            |
| Religious leaders                                |              |       |                |             |            |
| Co-workers                                       |              |       |                |             |            |
| Top results on search sites (e.g. Google, Baidu) |              |       |                |             |            |
| My social media community                        |              |       |                |             |            |
| Information from messaging Apps                  |              |       |                |             |            |

**Q10 When checking COVID 19 content - I pay specific attention to COVID-19 content which ... Please select all that apply. (MultipleSelection)**

- includes/is an image
- includes/is an article
- includes/is a video
- includes/is a meme
- includes/is an audio clip
- includes/is an infographic
- is humorous
- is concerning
- is scientific
- has a lot of shares/likes/retweets
- tells a story
- creates emotional reaction
- is related to an influencer or celebrity
- is relevant to me
- Other
- I don't pay attention to COVID19 content

**Q11 I most likely share content with my networks that ... Please select all that apply. (MultipleSelection)**

- includes/is an image
- includes/is an article
- includes/is a video
- includes/is a meme
- includes/is an audio clip
- includes/is an infographic
- is humorous
- is concerning
- is scientific
- has a lot of shares/likes/retweets
- tells a story
- creates emotional reaction
- is related to an influencer or celebrity
- is relevant to me
- I don't pay attention to COVID19 content
- Other
- I don't pay attention to COVID19 content

**Q12 The term 'fake news' has been used a lot recently. How aware are you of the fact that COVID-19 information on social media/messaging apps could be false? I am ... (SingleSelection)**

- very aware
- somewhat aware
- unaware
- I don't care whether content is real or fake

**Q13 You said that you don't care whether content is real or fake, please tell us why (OpenEnded)**

-

**Q14 We all share a lot of information on social media/messaging apps these days - do you make sure that information is correct before sharing? (SingleSelection)**

- All of the time
- Most of the time
- Sometimes
- Never
- I don't share content

**Q15 Have you ever shared something on social media/messaging apps that you later found out was incorrect? (SingleSelection)**

- Yes
- No
- I don't know
- I don't share content on social media/messaging apps

**Q16 Did you later share a correction or delete? (SingleSelection)**

- Yes
- No

**Q17 How do you react to COVID-19 information - shared by others on social media/messaging apps - that you know is false ? (SingleSelection)**

- I comment on the content
- I report the content
- I unfollow the person who posted it
- I ignore the content
- I share the content
- I don't know

**Q18 Overall, how do you feel about the existence of 'fake' information regarding COVID-19 on social media/messaging apps? (SingleSelection)**

- I am very concerned
- I am somewhat concerned
- I am not concerned
- I find it interesting
- I don't know

**Q19 How strongly do you agree or disagree with the following statements, when it comes to COVID-19?**  
**(MatrixSingleSelection)**

|                                                                                       | Strongly agree | Somewhat agree | Neither agree or disagree | Somewhat disagree | Strongly disagree | I don't know |
|---------------------------------------------------------------------------------------|----------------|----------------|---------------------------|-------------------|-------------------|--------------|
| I feel overwhelmed by the amount of information out there on COVID-19                 |                |                |                           |                   |                   |              |
| All information on social media is the same to me                                     |                |                |                           |                   |                   |              |
| I feel the media is not telling me everything                                         |                |                |                           |                   |                   |              |
| I have stopped paying attention to news and information on COVID-19 in general        |                |                |                           |                   |                   |              |
| I feel like my government is not giving me the full picture when it comes to COVID-19 |                |                |                           |                   |                   |              |
| I feel my government is not doing enough to control the pandemic                      |                |                |                           |                   |                   |              |
| I feel like my government is overreacting when it comes to COVID-19                   |                |                |                           |                   |                   |              |
| I am interested in news of a COVID-19 vaccine                                         |                |                |                           |                   |                   |              |

**Q20 How strongly do you agree or disagree with the following statements, when it comes to COVID-19? (MatrixSingleSelection)**

|                                                                       | Strongly agree | Somewhat agree | Neither agree or disagree | Somewhat disagree | Strongly disagree | I don't know |
|-----------------------------------------------------------------------|----------------|----------------|---------------------------|-------------------|-------------------|--------------|
| I believe that when we have the vaccine things will go back to normal |                |                |                           |                   |                   |              |
| I am optimistic about the future                                      |                |                |                           |                   |                   |              |
| I believe that COVID-19 content is biased                             |                |                |                           |                   |                   |              |
| Social distancing and hygiene directives are not really necessary     |                |                |                           |                   |                   |              |

**Q21 Considering your engagement with COVID-19 from months ago to now: What COVID-19 content were you interested in at the start of the pandemic? (MultipleSelection)**

- International updates
- National/local updates
- WHO health directives
- Health directives of my government
- International travel restrictions
- National/local travel restrictions
- Information about a vaccine
- Stories about personal experiences
- The opinions of celebrities/influencers
- I was not interested in COVID-19 content at the start of the pandemic

**Q22 What COVID-19 content are you interested in now? (MultipleSelection)**

- International updates
- National/local updates
- WHO health directives
- Health directives from my government
- International travel restrictions
- National/local travel restrictions
- Information about a vaccine
- Stories about personal experiences
- The opinions of celebrities/influencers
- I am not interested in COVID-19 content now



**Q23 How have you engaged with the World Health Organization (WHO) so far during the COVID-19 crisis? (MultipleSelection)**

- I actively search for WHO health directives
- I visit the WHO website
- I follow the WHO on social media
- I do not engage with WHO
- Other

**Q24 Why have you not engaged with the World Health Organization (WHO) during the COVID-19 crisis? Please select all that apply. (MultipleSelection)**

- I don't know what WHO is
- I do not engage with WHO content because I do not trust it
- I do not engage with WHO content because I have been using other sources
- I don't know how to find WHO information
- Other

**Q25 How do you think the World Health Organization (WHO) could improve communication about the COVID 19 crisis ? (OpenEnded)**

-

**Q26 One last question, what is monthly Household income? (SingleSelection)**

- I am a student
- Under \$500 USD
- \$501 to \$1,000 USD
- \$1,001 to \$1,500 USD
- \$1,501 to \$2,500 USD
- \$2,501 to \$5,000 USD
- \$5,001 to \$7,500 USD
- \$7,501 to \$10,000 USD
- \$10,001 to \$12,500 USD
- \$12,501 to \$15,000 USD
- \$15,000 USD+
- I am not currently employed
